# Supplementary material for: Novel environmental applications of green tea: sensing and remediation of Ag+ in aqueous system
Source: Royal Society of Chemistry journal article supplement (doi:10.1039/d4ra05545d), 2024-01-01
Supplement: d4ra05545d1.pdf [file d4ra05545d1.pdf]

## **Green tea capped magnetite nanoparticles for selective and sensitive recognition of Ag<sup>+</sup>**

**Ankita Doi,<sup>a</sup> Mainak Ganguly<sup>b\*</sup>, and Priyanka Sharma<sup>b</sup>**

**<sup>a</sup>Department of Biosciences, Manipal University Jaipur, Jaipur, 303007, Rajasthan, India**

**<sup>b</sup>Department of Chemistry, Manipal University Jaipur, Jaipur, 303007, Rajasthan, India**

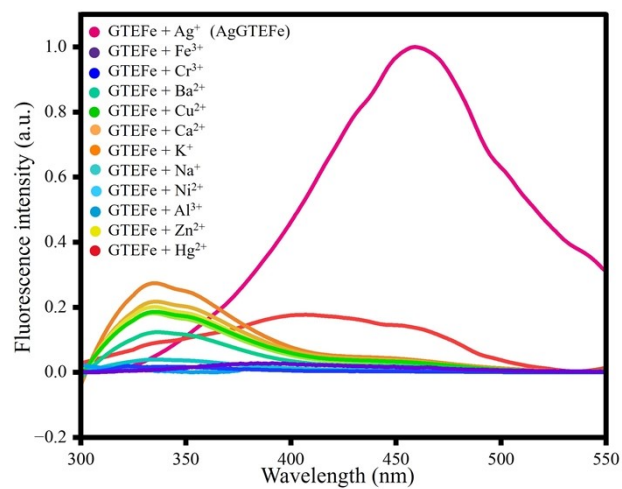

Figure S1: Fluorescence spectra of GTEFe in the presence of different metal ions.

$\lambda_{ex}$  290 nm and [metal ion] =  $10^{-3}$  M

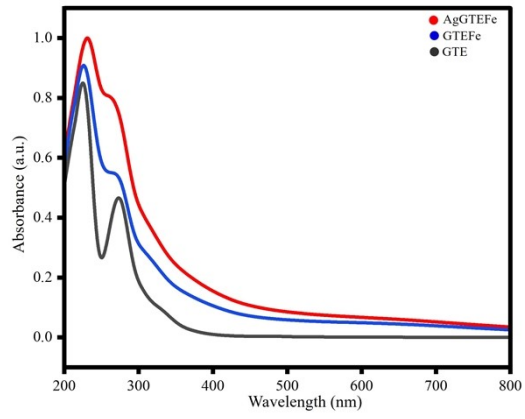

Figure S2: UV-Vis spectrum of GTE, GTEFe, AgGTEFe. GTE  $\lambda_{max}$  =274, GTEFe  $\lambda_{max}$  =270, and AgGTEFe  $\lambda_{max}$  =264 nm

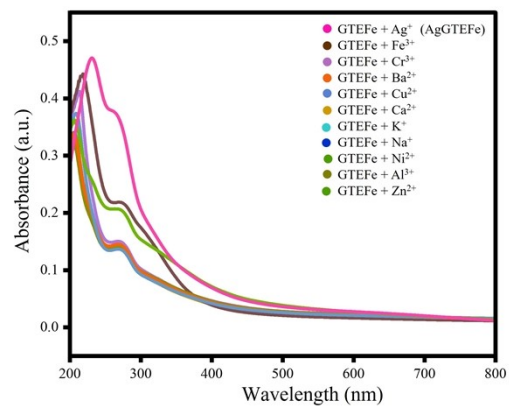

Figure S3: UV-Vis spectra of GTEFe in the presence of different metal ions

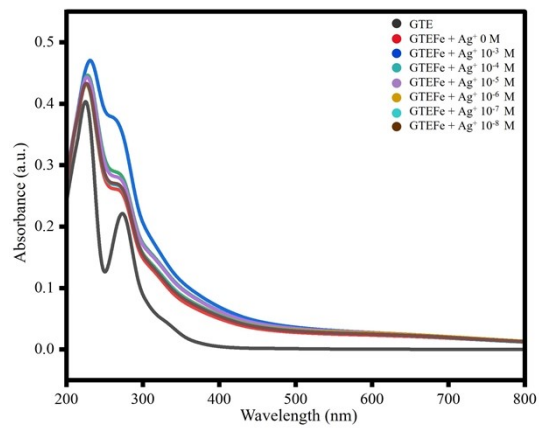

Figure S4: UV-Vis spectrum with GTE, GTEFe with [Ag<sup>+</sup>]

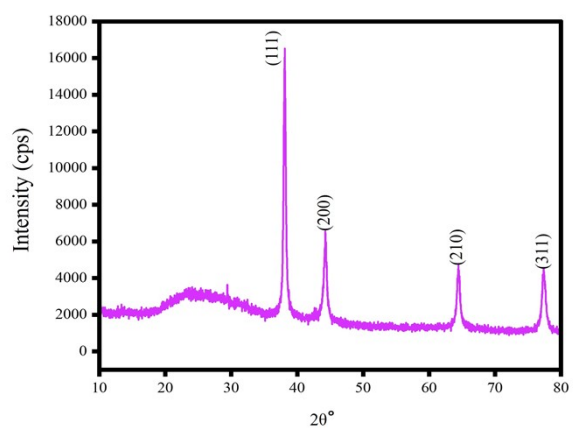

*Figure S5: XRD plot of AgGTEFe*

Table S1: Detection of Ag<sup>+</sup> with physico-chemical properties and applications

| S. no. | Response type            | Percentage of organic solvent in working solution | $\lambda_{\text{ex}}/\lambda_{\text{em}}$ (nm) | LOD of [Ag <sup>+</sup> ] | Linear detection range (concentration)       | Applications                                              |
|--------|--------------------------|---------------------------------------------------|------------------------------------------------|---------------------------|----------------------------------------------|-----------------------------------------------------------|
| 1.     | Quenching fluorescence   | 100% aqueous solution <sup>1</sup>                | 598/622 nm                                     | $5 \times 10^{-15}$ M     | $5 \times 10^{-15}$ to $8 \times 10^{-13}$ M | NA                                                        |
| 2.     | Enhancement Fluorescence | Semicarbazide <sup>2</sup>                        | 290/420 nm                                     | 7.7 $\mu$ M               | $10^{-3}$ M to $10^{-7}$ M                   | Real water analysis (rainwater, tap, drinking, and Ganga) |
| 2.     | Enhancement fluorescence | 3% of OPDA (, o-phenylenediamine) <sup>3</sup>    | 365/568 nm                                     | 60 nM                     | 60 nM to 60 $\mu$ M                          | Sewage water                                              |
| 3.     | Quenching fluorescence   | 50% DMSO <sup>4</sup>                             | 310/527 nm                                     | $6.37 \times 10^{-5}$ M   | 0–20 $\mu$ M                                 | NA                                                        |
| 4.     | Quenching fluorescence   | 100% THF <sup>5</sup>                             | 435/530 nm                                     | $5 \times 10^{-7}$ M      | 0.1 to 4.2 equiv.                            | NA                                                        |
| 5.     | Quenching fluorescence   | 10% Ethanol <sup>6</sup>                          | 619/760 nm                                     | $3 \times 10^{-8}$ M      | -                                            | Tap and lake water                                        |
| 6.     | Quenching fluorescence   | 100% aqueous solution <sup>7</sup>                | 307/358 nm                                     | $2.70 \times 10^{-6}$ M   | 0 to 24 $\mu$ M                              | NA                                                        |
| 7.     | Enhancement fluorescence | 50% MeOH <sup>8</sup>                             | 370/400 nm                                     | $1.28 \times 10^{-10}$ M  | -                                            | Ground, tap water, and live cells                         |
| 8.     | Enhancement fluorescence | 20% Ethanol <sup>9</sup>                          | 530/584 nm                                     | $1.29 \times 10^{-8}$ M   | 0.050-0.54 ppm                               | Sanitizer gel and fabric softener                         |
| 9.     | Enhancement fluorescence | 100% Methanol <sup>10</sup>                       | 520/576 nm                                     | $2.3 \times 10^{-7}$ M    | -                                            | NA                                                        |
| 10.    | Enhancement fluorescence | 100% aqueous solution <sup>11</sup>               | 330/506 nm                                     | $1.07 \times 10^{-7}$ M   | 0- 107 nM                                    | NA                                                        |
| 11.    | Ratiometric              | 100% aqueous solution <sup>12</sup>               | 405/481                                        | Not                       | -                                            | Live cells                                                |

|            |                          |                                     |                    |                         |                         |                      |
|------------|--------------------------|-------------------------------------|--------------------|-------------------------|-------------------------|----------------------|
|            |                          |                                     | and 565 nm         | measured                |                         |                      |
| <b>12.</b> | Ratiometric              | 70% MeOH <sup>13</sup>              | 405/481 and 565 nm | $6.29 \times 10^{-6}$ M | -                       | NA                   |
| <b>13.</b> | Ratiometric              | 100% Methanol <sup>14</sup>         | 470/510 and 525 nm | $1.5 \times 10^{-6}$ M  | -                       | NA                   |
| <b>14.</b> | Ratiometric              | 100% THF <sup>15</sup>              | 480/630 and 671 nm | Not measured            | -                       | NA                   |
| <b>15.</b> | Ratiometric              | 100% aqueous solution <sup>16</sup> | 450/500 and 535 nm | $3.7 \times 10^{-9}$ M  | 0–180 nM                | Tap and ground water |
| <b>16.</b> | Enhancement fluorescence | 100% water (present work)           | 290/400 and 467 nm | $1.0 \times 10^{-7}$ M  | $10^{-4}$ – $10^{-7}$ M |                      |



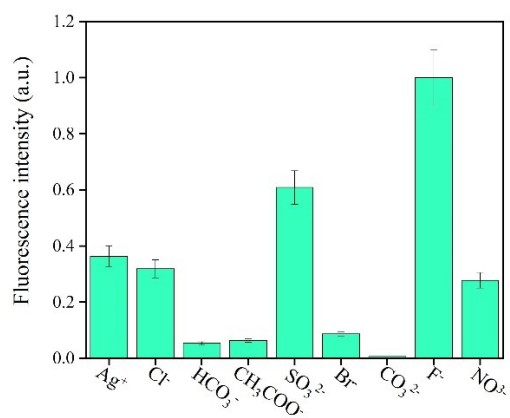

Figure S6: Effect of counter anions of sodium salts on the fluorescence of AgGTEFe.

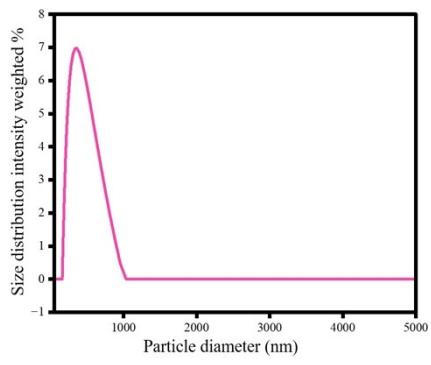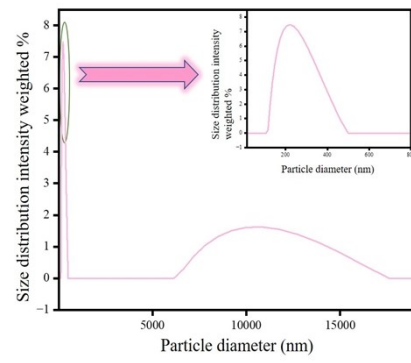

Figure S7: (a) DLS spectra of GTFe (b) DLS spectra of of AgGTFE.

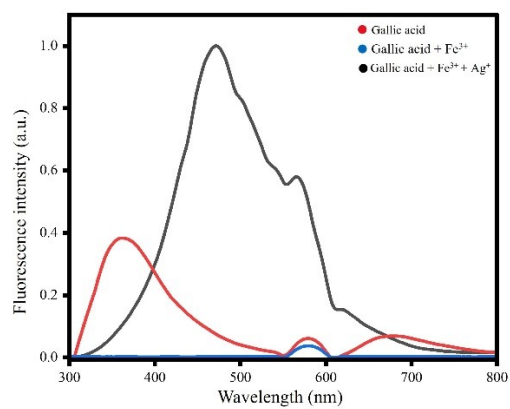

Figure S8: Fluorescence spectra of gallic acid, gallic acid + Fe<sup>3+</sup>, and gallic acid + Fe<sup>3+</sup> + Ag<sup>+</sup>

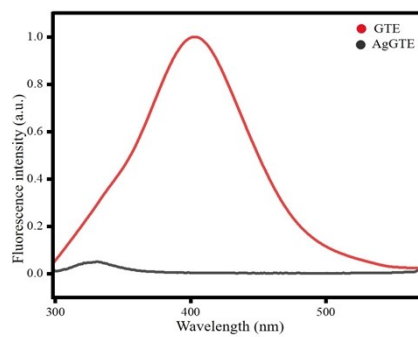

Figure S9: Fluorescence spectra of GTE and GTE + Ag<sup>+</sup>

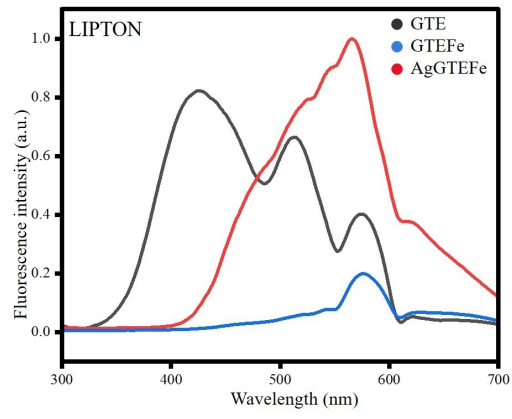

Figure S 10: Fluorescence intensity of LIPTON GTE, GTEFe, and AgGTEFe

### Supporting references

- 1 A. D. Arulraj, R. Devasenathipathy, S. M. Chen, V. S. Vasantha and S. F. Wang, *Sens. Bio-Sensing Res.*, 2015, **6**, 19–24.
- 2 S. Priyanka, M. Ganguly and A. Doi, *Appl. Nanosci.*, 2024, 1–13.
- 3 X. Yang and E. Wang, *Anal. Chem.*, 2011, **83**, 5005–5011.
- 4 S. Zhang, X. Wu, Q. Niu, Z. Guo, T. Li and H. Liu, *J. Fluoresc.*, 2017, **27**, 729–737.
- 5 W. Cui, L. Wang, G. Xiang, L. Zhou, X. An and D. Cao, *Sensors Actuators B. Chem.*, 2015, **207**, 281–290.
- 6 Y. Zhang, Q. Wang, G. Chen, P. Shi and W. Wang, *Polyhedron*, 2019, **169**, 247–252.
- 7 Y. Zhang, A. Ye, Y. Yao and C. Yao, , DOI:10.3390/s19020247.
- 8 N. Bhuvanesh, S. Suresh, P. R. Kumar, E. M. Mothi, K. Kannan, V. R. Kannan and R. Nandhakumar, *Journal Photochem. Photobiol. A Chem.*, 2018, **360**, 6–12.
- 9 A. Chatterjee, M. Santra, N. Won, S. Kim, J. K. Kim and S. Bin Kim, 2009, 2040–2041.
- 10 Y. Guo, S. Wang, H. Du, X. Chen and H. Fei, *Biomacromolecules*, 2019, **20**, 558–565.
- 11 L. N. Neupane, P. Thirupathi, S. Jang, M. J. Jang, J. H. Kim and K. H. Lee, *Talanta*, 2011, **85**, 1566–1574.
- 12 H. Wang, L. Xue and H. Jiang, *Org. Lett.*, 2011, **13**, 3844–3847.
- 13 B. Lotfi, A. Tarlani, P. Akbari-Moghaddam, M. Mirza-Aghayan, A. A. Peyghan, J. Muzart and R. Zadmand, *Biosens. Bioelectron.*, 2017, **90**, 290–297.
- 14 A. N. Kursunlu and E. Güler, *J. Mol. Struct.*, 2017, **1134**, 345–349.
- 15 A. Coskun and E. U. Akkaya, *J. Am. Chem. Soc.*, 2005, **127**, 10464–10465.
- 16 P. K. Mehta, L. N. Neupane, S. H. Park and K. H. Lee, *J. Hazard. Mater.*, 2021, **411**, 125041.
